# Supplementary material
Source: HighWire-hosted journal article supplement (https://ez-admanager.com/highwire/filestream/136446/field_highwire_adjunct_files/0/benarroch.pdf)
Supplement: benarroch.pdf [file benarroch.pdf]

# Los circuitos del asta dorsal

## Complejidad e implicancias para los mecanismos del dolor neuropático

Eduardo E Benarroch,  
MD

Correspondencia a  
Dr. Benarroch:  
benarroch.eduardo@mayo.edu

La transmisión del dolor involucra varios tipos de aferencias primarias amielínicas A $\delta$  y C de las neuronas del ganglio de la raíz dorsal (o del trigémino); estos aferentes activan neuronas de proyección de segundo orden espinotalámicas y espinobulbares en el asta dorsal (o en el núcleo caudalis del trigémino). El asta dorsal no es una simple estación de retransmisión, sino más bien un sitio complejo de procesamiento y decodificación de la información nociceptiva a través de circuitos que involucran diferentes subtipos de interneuronas excitatorias o inhibitorias. Estas neuronas son el blanco de influencias moduladoras descendentes del bulbo ventromedial rostral y otras regiones. Los circuitos del dolor también participan en el relevo y el procesamiento de la sensación de prurito. Marcadores moleculares específicos, tales como canales de potencial receptor transitorio (TRP) y los subtipos de receptores ligados a Mas acoplados a proteína G (Mrgpr), han permitido la identificación de diferentes subtipos de aferentes primarias que transmiten sensaciones de dolor y prurito. La aplicación de técnicas transgénicas y de ablación ha proporcionado información sobre la heterogeneidad de las interneuronas excitatorias o inhibitorias y su participación en los circuitos del asta dorsal que regulan la transmisión y decodificación del dolor y el prurito. Las interneuronas excitatorias tienen un papel importante tanto en la transmisión normal como anormal de la entrada sensorial a las neuronas de proyección; las interneuronas inhibitorias están críticamente involucradas en la decodificación de estas entradas. Estos hallazgos proporcionan nuevos conocimientos sobre la fisiopatología de las manifestaciones del dolor neuropático, incluyendo el dolor espontáneo, hiperalgesia y alodinia mecánica, así como el prurito neuropático. Hay numerosas revisiones en todos estos tópicos.<sup>1-19</sup> Esta revisión se centra en el asta dorsal de la médula, aunque es probable que procesos similares subyacen al dolor facial mediado por el trigémino.

**COMPONENTES BÁSICOS DEL CIRCUITO DEL ASTA DORSAL.** El asta dorsal de la médula espinal es clásicamente subdividida citoarquitectónicamente

en 5 láminas, según Rexed<sup>20</sup> (figura 1). Las láminas I y II constituyen el asta dorsal superficial. La lámina I contiene principalmente diferentes subtipos de neuronas de proyección (espinotalámicas y espinobulbares). La lámina II o sustancia gelatinosa está subdividida en una región exterior e interior, ambas contienen diferentes subtipos locales de interneuronas excitatorias o inhibitorias. Las láminas III a V constituyen el asta dorsal profunda y contienen diferentes subtipos de neuronas de proyección, así como de interneuronas. Tanto las neuronas de proyección como las interneuronas locales reciben señales lámina-específica de diferentes subtipos de aferentes primarios de neuronas del ganglio de la raíz dorsal.

**Aferentes primarios.** Hay numerosas poblaciones de aferencias primarias que difieren en el diámetro de su axón, la respuesta a estímulos, las características neuroquímicas y blancos en el asta dorsal. El neurotransmisor principal de todos estos aferentes es L-glutamato. Esta revisión se centra en las aferencias primarias que inervan la piel (tabla 1).

**Nociceptores.** Hay varios subtipos de pequeñas fibras mielinizadas A $\delta$  y nociceptores C no mielinizados que inervan la piel.<sup>1,2</sup> Estos pueden subdividirse en 2 principales poblaciones neuroquímicas. Aferentes peptidérgicos contienen neuropéptidos, tales como sustancia P y péptido relacionado al gen de calcitonina, ellos transmiten estímulos dolorosos por calor y terminan en las neuronas de proyección e interneuronas en las láminas más superficiales del asta dorsal (lámina I y lámina exterior II). Estas fibras aferentes expresan el receptor de potencial receptor transitorio vaniloide 1 (TRPV1), que los hace sensibles al calor y la capsaicina, y el receptor del potencial receptor transitorio anquirina 1 (TRPA1), que responde a varios irritantes químicos. Por el contrario, las fibras aferentes C no peptidérgicas transmiten dolor mecánico, pero no inducido por calor, y proyectan en interneuronas de la lámina interior II. Estas poblaciones no peptidérgicas expresan lectina IB4 y el miembro D de Mrgpr (MrgprD).<sup>1,2</sup> Al igual que todos los aferentes nociceptivos primarios, utilizan L-glutamato como su transmisor principal.

### GLOSARIO

**BDNF** = *brain derived neurotrophic factor* (factor neurotrófico derivado del cerebro); **GABA** = ácido y aminobutírico; **Mrgpr** = Mas-related G-protein-coupled receptor (receptor acoplado a proteína G relacionado con Mas); **NK1R** = receptor neuroquinina 1; **TRP** = transient receptor potential (potencial receptor transitorio); **TRPA1** = potencial receptor transitorio anquirina 1; **TRPM8** = Potencial receptor transitorio; tipo melastatina 8; **TRPV1** = Potencial receptor transitorio; tipo vaniloide 1.

Del Department of Neurology, Mayo Clinic, Rochester MN.

Ir a [Neurology.org](http://Neurology.org) para las declaraciones completas. Información sobre financiación y declaraciones relevantes por los autores si hubiese, se proveen al final del artículo.

Figura 1 Transmisión de señales aferentes desde receptores nociceptivos y táctiles hacia el asta dorsal

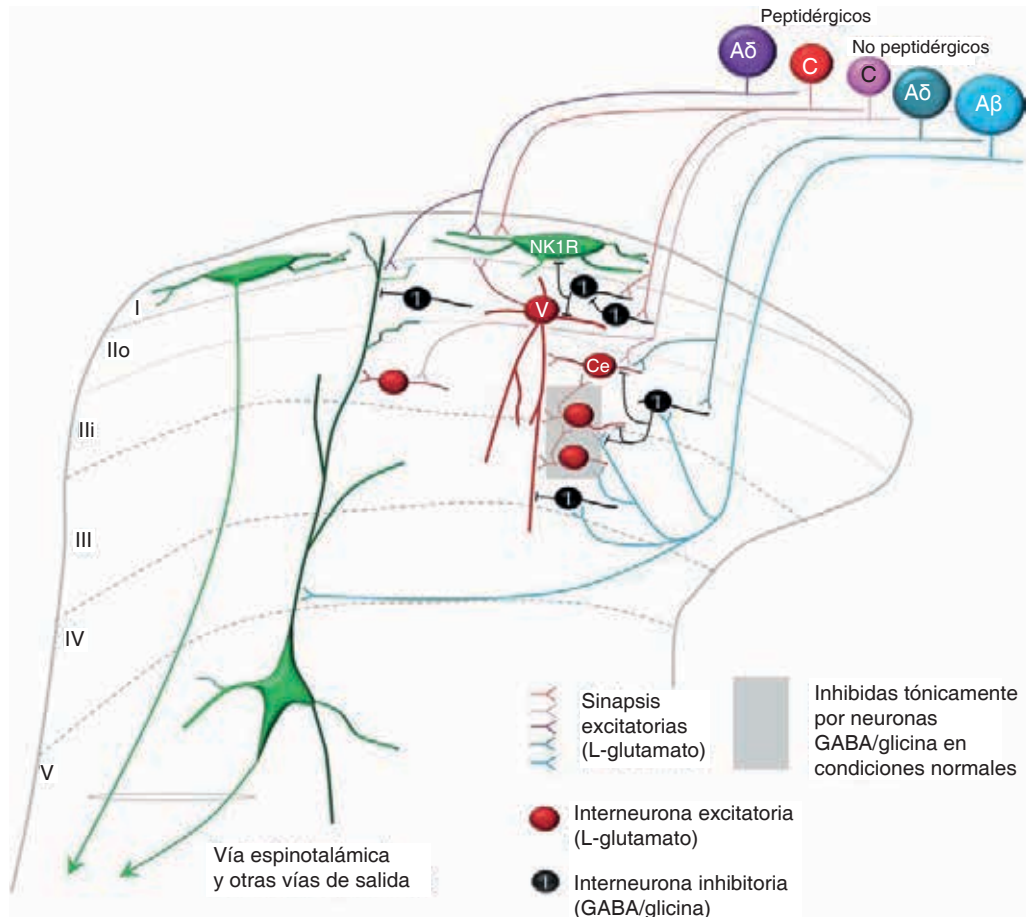

Aferentes peptidérgicos y no peptidérgicos A $\delta$  y nociceptores C, aferentes mecanorreceptivos de bajo umbral A $\beta$  y aferentes mecanorreceptivos de bajo umbral C (no mostrado), proveen señales de entrada a neuronas de proyección e interneuronas en diferentes láminas del asta dorsal. Neuronas de proyección nociceptivas expresan receptor neuroquinina (NK1R) y están localizadas primariamente en la lámina I, otras neuronas de proyección son neuronas de rango dinámico amplio y están distribuidas en lámina III, IV y V así como en láminas III y IV. La lámina II está subdividida en una región externa (IIo) e interna (IIi) conteniendo diferentes subtipos de interneuronas locales excitatorias e inhibitorias. Los aferentes peptidérgicos transmiten estímulos calóricos dolorosos y terminan en neuronas de proyección de la lámina I y la lámina IIo. Los aferentes no peptidérgicos transmiten dolor mecánico inducido a neuronas excitatorias de la lámina III, que llevan estas señales a las neuronas de proyección de la lámina I por una vía excitatoria polisináptica que incluye neuronas centrales (Ce) y verticales (V). Los mecanorreceptores A $\beta$  de bajo umbral hacen blanco primariamente en láminas III-V. Interneuronas inhibitorias ácido y aminobutíricas (GABA)/glicinérgicas, células primarias en islotes (I), reciben señales tanto de mecanorreceptores de bajo umbral como nociceptores y bloquean la transmisión de señales nociceptivas en el asta dorsal así como previenen el acceso de mecanorreceptores de bajo umbral hacia interneuronas excitatorias, neuronas inhibitorias también controlan la excitabilidad de las neuronas de proyección de las láminas III-V, las cuales reciben tanto señales nociceptivas como no nociceptivas.

**Pruriceptores.** Algunas neuronas cutáneas C nociceptivas también responden a sustancias químicas que provocan la sensación de prurito, como la histamina; estos aferentes se conocen como pruritoceptores o prurirreceptores.<sup>9,10</sup> Detectan una amplia variedad de estímulos pruritogénicos a través de múltiples tipos de receptores acoplados a proteínas G, incluso los receptores H1 y H4 para los receptores de la histamina, los receptores acoplados a proteína G relacionado con Mas MrgprA3 y MrgprD, y el receptor 2 asociado a la proteinasa, entre otros.<sup>9,10,21</sup> Los receptores de prurito acoplados a proteína G gatillan una cascada de señales que abren los canales TRP, tales como TRPV1 y TRPA1.<sup>22,23</sup> Por ejemplo, la histamina desencadena prurito en humanos vía aferentes C no mecano-

sensibles.<sup>24</sup> Muchos de estos aferentes son también nociceptivos y expresan receptores tanto H1 como TRPV1, la presencia de receptores TRPV1 es requerida por la histamina para desencadenar prurito.<sup>22,25</sup> Sin embargo, la activación de aferentes que expresan tanto receptores TRPV1 y MrgprA3 y que responden al agente antimalárico cloroquina gatilla prurito, pero no dolor.<sup>26</sup> Otros subtipos de aferentes también responden a grupos específicos de pruritógenos. Por ejemplo, el prurito producido por el suplemento dietario  $\beta$ -alanina involucra aferentes que expresan MrgprD.<sup>21</sup>

**Mecanorreceptores C de bajo umbral.** Hay dos subtipos de aferentes C amielínicos que responden a estímulos de baja intensidad (no dolorosos) y han sido asociados con la sensación afectiva del tacto agra-

**Tabla 1 Aferencias primarias de la piel en el asta dorsal**

| Tipo de fibra (diámetro)              | Velocidad de conducción | Tipo de receptor                                  | Modalidad                                   | Marcador neuroquímico                                            |
|---------------------------------------|-------------------------|---------------------------------------------------|---------------------------------------------|------------------------------------------------------------------|
| Tipo Aβ (mielinizadas gruesas, 10 μm) | 60 m·s <sup>-1</sup>    | Mecanorreceptores de umbral bajo                  | Tacto discriminativo                        | Receptores opioides Δ                                            |
| Tipo Aδ (finas mielinizadas, 2.5 μm)  | 12 m·s <sup>-1</sup>    | Nociceptores peptidérgicos                        | Dolor desencadenado por el calor            | CGRP, canales TRPV1 y TRPA1, receptores opioides μ               |
|                                       |                         | Nociceptores no peptidérgicos                     | Dolor desencadenado por estímulos mecánicos | MrgprD, receptores Δ- opioides                                   |
|                                       |                         | Receptores de frío                                | Frío inocuo                                 | Canales TRPM8                                                    |
| Tipo C (no mielinizadas, 2.5 μm)      | < 2 m·s <sup>-1</sup>   | Nociceptores peptidérgicos                        | Dolor desencadenado por el calor            | Sustancia P, CGRP, canales TRPV1 y TRPA1, receptores opioides μ  |
|                                       |                         | Nociceptor no peptidérgico                        | Dolor desencadenado por estímulos mecánicos | MrgprD, receptores opioides δ                                    |
|                                       |                         | Receptores de calor                               | Calor inocuo                                | Sustancia P TRPV1                                                |
|                                       |                         | Receptores de prurito                             | Prurito                                     | Sustancia P, CGRP, polipéptido natriurético B, TRPV1 H1, MrgprA3 |
|                                       |                         | Mecanorreceptores de bajo umbral, mecanorreceptor | Tacto emocional                             | Mrgpr4, tirosin-hidroxilasa                                      |

Abreviaturas: CGRP = péptido relacionado al gen de calcitonina; Mrgpr = receptor acoplado a Mas relacionado con proteína G; TRPM8 = potencial receptor transitorio, tipo melastatina; TRPA1 = potencial receptor transitorio anquirina 1; TRPV = potencial receptor transitorio, tipo vaniloide 1

dable<sup>27</sup>. La población más grande expresa tirosina hidroxilasa y el subtipo 3 del transportador vesicular de glutamato, una segunda población expresa el receptor MrgprB4 y finaliza en la lámina II externa.

**Mecanorreceptores de bajo umbral Aβ.** Aferencias mielinizadas de gran diámetro Aβ transmiten impulsos no dolorosos de mecanorreceptores de bajo umbral mecanotáctil involucrados en el tacto discriminativo. Estas aferencias expresan receptores opioides de tipo δ.<sup>28</sup> Aferencias mecanosensitivas Aβ de bajo umbral arborizan en un área que se extiende desde la lámina II interna a la lámina V y tienen por blanco diferentes subpoblaciones en láminas específicas.<sup>1,2,4</sup>

**Termorreceptores.** Las neuronas primarias cutáneo sensoriales involucradas en la sensación térmica incluyen tanto fibras Aδ como C, las fibras C inervan las láminas I y II y las Aδ, las láminas I y V. La sensibilidad térmica involucra la activación selectiva térmico-dependiente de diferentes subtipos de TRP y otros canales iónicos en estas aferencias. Por ejemplo, las aferencias C que responden al frío expresan el receptor del potencial receptor transitorio melastatina 8 (TRPM8) y termina en la lámina I.<sup>29</sup> Los mecanismos subyacentes a la sensación térmica han sido revisados<sup>30</sup> y no son discutidos acá.

**Neuronas de proyección.** Las neuronas de proyección (o salida) del asta dorsal transmiten información sensorial vía el tracto espinotalámico y múltiples vías paralelas. Estas neuronas están localizadas en la lámina I y las láminas III-V y reciben señales desde aferentes primarios tanto directos como vía interneuronas (figura 1). A pesar de su importancia, las neuronas de proyección sólo constituyen una pequeña proporción de la población neuronal total del asta dorsal.

**Lámina I.** La lámina I contiene la mayoría de las neuronas de proyección del tracto espinotalámico. Incluyen neuronas nociceptivas específicas sensibles al dolor inducido por calor o mecánico, las

neuronas que responden al enfriamiento inocuo y neuronas sensibles al calor nocivo, al mecánico nocivo (pellizco) o al estímulo del frío.<sup>31</sup> Algunas neuronas de la lámina I también pueden ser activadas por agentes pruriginosos tales como la histamina. La mayoría las neuronas nociceptivas de la lámina I tienen una morfología fusiforme o multipolar y expresan el receptor de neuroquinina 1 (NK1R) para la sustancia P.<sup>32</sup> Estas neuronas transmiten aspectos discriminativos de dolor, tales como su ubicación y calidad, pero también participan en los aspectos emocionales de la sensación de dolor a través de vías espinotalámicas paralelas.<sup>1</sup> Los principales blancos de estas neuronas son el complejo ventral posterior del tálamo (núcleos ventral posterior lateral, ventral posterior medial y ventral posterior inferior), que se proyectan a la corteza somatosensorial primaria y secundaria,<sup>33</sup> y la parte posterior del núcleo medial ventral del tálamo, que se proyecta a la corteza dorsal posterior insular.<sup>34</sup> Otros objetivos de las neuronas de proyección NK1R de lámina I incluyen el núcleo parabraquial lateral, que proporciona el acceso de la información nociceptiva a la amígdala e hipotálamo, y la sustancia gris periacueductal, que participa en los circuitos moduladores centrales del dolor.

Mientras que hasta el 80% de las neuronas de la lámina I del asta dorsal expresan NK1R y transmiten señales de dolor provocado por el calor desde aferentes peptidérgicos C, la delección genética o el bloqueo farmacológico de la sustancia P o el receptor NK1 tiene un efecto limitado en la transmisión del dolor tanto en animales de experimentación<sup>35</sup> como en humanos.<sup>36</sup> Esto enfatiza la importancia de otros impulsos aferentes, incluso entradas glutamatérgicas excitatorias vía interneuronas en la lámina II, en la conducción de la actividad de las neuronas nociceptivas de proyección de la lámina I (véase más adelante).

La lámina I también contiene neuronas piramidales que carecen de NK1R; estas neuronas pueden

recibir señales no nociceptivas de mecanorreceptores de bajo umbral C de señalización de toque afectivo o aferentes C que expresan TRMP8 que responden a frío inocuo.<sup>29</sup> La inflamación periférica puede provocar la expresión de novo de NK1R en estas neuronas piramidales, por consiguiente activando estas neuronas a responder a estímulos nocivos.<sup>37</sup>

**Asta dorsal profunda.** Las neuronas de proyección situadas en el asta dorsal profunda (láminas III-V) incluyen un rango dinámico amplio de neuronas que responden tanto a estímulos inocuos como nocivos; estas neuronas tienen campos receptivos amplios y de codificación de intensidad del estímulo. Las señales inocuas hacia estas neuronas derivan de las fibras aferentes de gran diámetro Aβ. Las neuronas de amplio rango dinámico de la lámina III expresan receptores NK1R y dirigen dendritas dorsalmente a lo largo, que penetran el asta dorsal superficial (lámina I-II) y, por lo tanto, pueden ser activadas por aferentes peptidérgicas. Las neuronas de la lámina V también extienden dendritas a la lámina superficial II y también pueden ser directamente activadas por aferentes primarias, pero también recibir señales de las interneuronas excitatorias de la lámina II profunda que recibe aferentes nociceptivos no peptidérgicos<sup>38</sup> (figura 1). Las neuronas de la lámina V contribuyen al tracto espinotalámico y también alcanzan estructuras subcorticales que participan en el procesamiento afectivo de la sensación de dolor, tales como la amígdala y el hipotálamo y, al menos en ratones, también el globo pallidus.<sup>38</sup>

**Interneuronas.** Las interneuronas del asta dorsal tienen un rol crítico en la transmisión y codificación de la transmisión nociceptiva. Éstas ocupan la lámina I a III, aunque en su mayoría están concentradas en la lámina II.<sup>1,2</sup> Las interneuronas del asta dorsal constituyen una población heterogénea e incluyen numerosos subtipos que difieren en su morfología, neuroquímica, electrofisiología y conectividad<sup>1,6,39-47</sup> (tabla 2). Las morfologías más predominantes son las células en islotes, centrales, radiales y verticales (también denominadas células pedunculadas), que pueden ser o bien excitatorias o inhibitorias. Las interneuronas inhibitorias utilizan ácido γ-aminobutírico (GABA), glicina o ambos como neurotransmisor. En general, la mayoría de

estas interneuronas inhibitorias son células en islotes; otras tienen morfologías centrales y verticales. Las interneuronas excitatorias utilizan L-glutamato e incluyen células radiales y la mayor parte de las células centrales y verticales.<sup>1,39-47</sup>

**Interneuronas inhibitorias.** Las interneuronas inhibitorias constituyen aproximadamente un tercio de la población neuronal en el asta dorsal. Hay varias subpoblaciones no superpuestas de interneuronas GABA/glicinérgicas que pueden coexpresar parvalbúmina, dinorfina, neuropéptido Y, galanina y óxido nítrico sintetasa; estas subpoblaciones también difieren en sus propiedades electrofisiológicas y en sus aferencias.<sup>40-42</sup> Por ejemplo, interneuronas inhibitorias de descarga tónica que expresan parvalbúmina reciben principalmente el aporte de aferentes primarios Aβ de bajo umbral y establecen sinapsis axo-axónicas con aferentes mielinizadas que inervan las interneuronas excitatorias.<sup>45</sup> Por el contrario, las neuronas inhibitorias que expresan galanina, neuropéptido Y, óxido nítrico sintetasa neuronal o dinorfina reciben información de aferentes nociceptivos y hacen sinapsis con interneuronas excitatorias u otras interneuronas inhibitorias.<sup>1,39-41,45</sup>

**Interneuronas excitatorias.** Las interneuronas excitatorias incluyen una población más grande y aún más heterogénea que las neuronas inhibitorias.<sup>1,39,40,42-46</sup> Mientras que todas las neuronas excitatorias son glutamatérgicas, se pueden subdividir en diferentes subpoblaciones de acuerdo con la expresión de transportadores de glutamato vesicular; somatostatina; somatostatina 2A, receptores opioides o de glutamato y marcadores tales como la proteína quinasa Cγ o péptido liberador de gastrina. Muchas neuronas excitatorias expresan la proteína de unión a calcio calretinina.<sup>44</sup> Subpoblaciones selectivas de interneuronas excitatorias pueden recibir contribuciones de distintas aferencias primarias. Por ejemplo, las interneuronas verticales que expresan somatostatina reciben información de mecanorreceptores de bajo umbral Aβ como de nociceptores de alto umbral Aδ/C<sup>42</sup>; neuronas que expresan el transportador vesicular de glutamato 3 o proteína quinasa Cγ reciben señales de mecanorreceptores de bajo umbral Aβ<sup>47</sup>; y las neuronas liberadoras de péptido gastrina son activadas por pruriceptores.<sup>25</sup> Las interneuronas excitatorias también varían en su

**Tabla 2** Principal población de interneuronas del asta dorsal

| Tipo                                                  | Inhibitorio                                                                                 | Excitatorio                                                                                                                                      |
|-------------------------------------------------------|---------------------------------------------------------------------------------------------|--------------------------------------------------------------------------------------------------------------------------------------------------|
| <b>Morfología (más común)</b>                         | En islotes                                                                                  | Células verticales (pedunculadas), centrales y radiales                                                                                          |
| <b>Neurotransmisor primario</b>                       | GABA, glicina o ambos, dinorfina en algunos casos                                           | L-glutamato                                                                                                                                      |
| <b>Marcadores neuroquímicos y subtipos (ejemplos)</b> | Parvalbúmina, neuropéptido Y, galanina, NOS neuronal                                        | Somatostatina; receptores de somatostatina A2, proteínquinasa C-γ, péptido relacionado a la gastrina, receptor del péptido liberador de gastrina |
| <b>Aferentes entrantes</b>                            | Relativamente débil                                                                         | Fuerte                                                                                                                                           |
| <b>Canal iónico típico (corriente)</b>                | Canales de compuerta asociados a nucleótidos cíclicos 1 y 4 activados por hiperpolarización | Kv4.2, Kv4.3 (corriente-A)                                                                                                                       |
| <b>Patrón de descarga típico</b>                      | Descargas tónicas                                                                           | Transitorio (células centrales), retardado (células verticales)                                                                                  |

Abreviatura: GABA = ácido γ-aminobutírico

patrón de disparo, el cual está determinado en gran medida por la presencia de corriente del tipo A a través de canales Kv<sup>4,6</sup> (tabla 2).

**LÍNEAS PARALELAS PARA LA TRANSMISIÓN DE INFORMACIÓN AFERENTE EN EL ASTA DORSAL**  
**Aferencias nociceptivas peptidérgicas vs nopeptidérgicas.** Estudios de ablación selectiva muestran que subconjuntos de nociceptores son selectivos para una modalidad particular y participan en la transmisión de vías determinadas.<sup>38,48,49</sup> El receptor peptidérgico TRPV1 que expresan señales nociceptivas de dolor inducido por calor y actúan sobre las láminas más superficiales del asta dorsal, incluyendo neuronas de proyección que expresan NK1R de la lámina I e interneuronas de la lámina II externa. Estos aferentes peptidérgicos involucran diferentes subconjuntos de neuronas inhibitorias<sup>50</sup> y excitatorias<sup>51</sup> del asta dorsal superficial. A diferencia, las aferentes no peptidérgicas MrgprD que expresan señal de dolor inducido mecánicamente activan interneuronas excitatorias de la lámina II interna, que luego transmiten señales mecánicas dolorosas a la lámina I por vías polisinápticas (véase más adelante). Mientras que las aferencias C no peptidérgicas que activan todo tipo de interneuronas excitatorias, pueden no estimular directamente interneuronas inhibitorias.<sup>52</sup> En consonancia con estas diferencias, los aferentes peptidérgicos expresan receptores opioides  $\mu$ , mientras que los aferentes no peptidérgicos expresan receptores opioides  $\delta$ .<sup>53</sup>

**Aferentes del prurito.** Hay evidencia que indica que hay una vía específica para la sensación de prurito.<sup>7-10,21,25</sup> Los estudios realizados en ratones definieron un circuito específico para el prurito en el asta dorsal superficial.<sup>25</sup> Este circuito consiste en pruriceptores aferentes C que liberan polipéptido natriurético B (también referido como péptido natriurético cerebral) además de L-glutamato; este péptido activa un grupo de interneuronas que expresan el péptido de liberación gástrico, que a su vez actúa a través de sus receptores en una tercera población de neuronas excitatorias que transmiten la sensación de prurito a través de las neuronas espinotalámicas de la lámina I.<sup>25</sup>

**PAPEL DE LAS INTERNEURONAS EN LOS CIRCUITOS DEL ASTA DORSAL**  
**Circuitos de alimentación prospectiva excitatoria para señales nociceptivas y pruriginosas.** Los aferentes nociceptivos estimulan neuronas espinotalámicas tanto directamente como a través de un circuito paralelo de alimentación prospectiva a través de interneuronas excitatorias (figura 1). Mientras que las neuronas nociceptivas de la lámina I que expresan NK1R reciben el aporte directo de aferentes peptidérgicos que codifican calor-dolor, reciben señales indirectas desde los aferentes no peptidérgicos codificantes del dolor mecánico a través de una vía polisináptica ventral a dorsal que implica la activación secuencial de las interneuronas excitatorias de la capa interna (ventral) a las interneuronas de la externa (dorsal) de lámina II.<sup>1,42,54</sup> Los nociceptores C mecanosensibles no peptidérgicos actúan sobre interneuronas

centrales en la lámina II interna, que a su vez excitan las células verticales en la lámina II externa; las neuronas verticales envían proyecciones excitatorias a neuronas espinotalámicas que expresan NK1R en la lámina I.<sup>54</sup> Esta vía interneuronal es la causa de las respuestas polimodales de las neuronas espinotalámicas de la lámina I tanto para estímulos de calor y mecánico nocivos. Dado que las interneuronas excitatorias verticales en la lámina exterior II también reciben aportes directos de nociceptores A $\delta$ , este circuito proporciona una vía excitatoria de soporte para la transmisión nociceptiva en la lámina I. También hay una vía paralela dorso-ventral a neuronas de proyección en el asta dorsal profunda; las neuronas excitatorias de la lámina II pueden retransmitir señales de aferencias C no peptidérgicas a la lámina V.<sup>38</sup> La transmisión de sensación de prurito también implica una vía excitatoria secuencial activada por aferentes C que liberan péptido natriurético B e incluyen interneuronas que liberan péptido liberador de gastrina y sus blancos.<sup>25</sup>

La eliminación selectiva del gen que codifica el receptor huérfano testicular 4 en ratones que depleciona subconjuntos de interneuronas excitatorias, resalta la importancia de estas neuronas para la expresión plena del dolor y la sensación de prurito.<sup>55</sup>

**Acceso de señales mecanorreceptivas de bajo umbral a neuronas nociceptivas.** La transmisión de señales mecánicas inocuas (tacto) al asta dorsal superficial también implica una vía secuencial de interneuronas excitatorias de proyección dorsal en la lámina II.<sup>42,47,54,56</sup> Los mecanorreceptores de bajo umbral A $\beta$  activan interneuronas excitatorias en la lámina III que expresan el transportador vesicular de glutamato-3; estas neuronas se proyectan a interneuronas que expresan la proteína quinasa C $\gamma$  en la lámina II, que a su vez activan secuencialmente células centrales en la lámina interior II, células verticales en la lámina exterior II y, por último neuronas de proyección nociceptivas que expresan NK-1 en la lámina I.<sup>47</sup> La convergencia de señales mecánicas nociceptivas directas A $\delta$ /C y señales de mecanorreceptores de interneuronas excitatorias de bajo umbral A $\beta$  en interneuronas excitatorias verticales en la lámina II exterior proporciona un sustrato para que los estímulos mecánicos inocuos puedan provocar dolor (alodinia mecánica), como se discute abajo. Al igual que los aferentes A $\beta$ , los aferentes táctiles C (mecanorreceptores C de bajo umbral) también se proyectan al interior de la lámina II y tienen acceso, a través de interneuronas excitatorias, a neuronas de proyección de amplio rango dinámico situadas en la lámina I y la lámina V,<sup>57</sup> con lo que potencialmente contribuirían a la alodinia mecánica. Sin embargo, en condiciones normales, el acceso de las señales de mecanorreceptores de bajo umbral a las neuronas nociceptivas es impedido por la inhibición mediada por alimentación prospectiva circundante.<sup>42</sup>

**Circuitos inhibitorios de alimentación prospectiva.** Como todas las fibras aferentes primarias son excitatorias, las interneuronas inhibitorias locales acti-

vadas por estas aferentes sirven como un mecanismo de control de compuertas para reducir la transmisión de información nociceptiva, pruriginosa y táctil a las neuronas espinotalámicas. De acuerdo con la teoría de control de compuertas de Melzack y Wall,<sup>58</sup> fibras aferentes de gran diámetro que transportan estímulos inocuos activan neuronas inhibitorias en la sustancia gelatinosa, que a su vez inhiben las neuronas de proyección del asta dorsal que transmiten señales de los aferentes nociceptivos. Las células de los islotes GABA/glicina inhibitorias que expresan parvalbúmina, distribuidas desde la lámina II interna hasta la lámina IV pueden proporcionar el sustrato para este mecanismo inhibitorio de control de compuerta, ya que reciben el aporte de aferentes primarias de bajo umbral (figura 1). Algunas células de los islotes también pueden recibir aportes de las fibras C mecanosensitivas de bajo umbral y podrían por lo tanto, contribuir a los efectos inhibitorios de dolor de los estímulos inocuos.<sup>59</sup> La inhibición en el asta dorsal puede ocurrir a través de ambos mecanismos, presináptico y post sináptico. Por ejemplo, las neuronas GABAérgicas que expresan parvalbúmina en la láminas II interna y III proporcionan la inhibición axo-axónica de las aferentes primarias mielinizadas, con ello reduciendo el acceso de las señales de los aferentes de bajo umbral a neuronas excitatorias.<sup>45</sup> Estudios de delección indican que grupos específicos de neuronas inhibitorias GABAérgicas<sup>60,61</sup> o glicinérgicas<sup>62</sup> también están involucradas en la inhibición tónica de la vía del prurito. Células inhibitorias de los islotes pueden mediar en el control modulador monoaminérgico descendente sobre la transmisión del dolor.<sup>40,63</sup> La teoría de control de compuertas también propone que los estímulos nocivos abrirían la compuerta mediante la inhibición de las interneuronas inhibitorias.<sup>58</sup> Consistente con esta hipótesis, algunas células inhibitorias de los islotes o centrales reciben el aporte directo de fibras C nociceptivas que contienen sustancia P y son activadas por estímulos nociceptivos; estas células podrían promover la transmisión del dolor mediante la inhibición de otras células inhibitorias en islotes.<sup>50</sup>

**CORRELACIONES CLÍNICAS: EI ASTA DORSAL, SENSIBILIZACIÓN CENTRAL Y DOLOR NEURO-PÁTICO** El dolor neuropático refleja la lesión del sistema sensitivo, llevando a una disminución del umbral para la sensación de dolor, resultando en dolor espontáneo, aumento de la amplitud y la duración de las respuestas al dolor (hiperalgesia), y aparición de dolor por estímulos inocuos (alodinia). Estas diversas manifestaciones reflejan diferentes combinaciones de perturbaciones de la transmisión nociceptiva y el procesamiento a nivel de los nociceptores periféricos, el asta dorsal (o núcleo caudalis del trigémino) y centros supramedulares. El prurito es una sensación sensitiva y emocional displacentera que produce el deseo de rascarse y tiene varias características comunes con el dolor.<sup>7</sup> Por ejemplo, agentes que producen prurito, como la histamina o capsaicina, activan aferentes prima-

rias nociceptivas y pueden generar simultáneamente prurito y sensación de dolor;<sup>64</sup> las personas con insensibilidad congénita al dolor son también normalmente insensibles al prurito.<sup>65,66</sup> Sin embargo, picazón y dolor son sensaciones independientes que pueden ser inversamente relacionadas entre sí; por ejemplo, estímulos nociceptivos contrarios (arañazos) alivian transitoriamente el prurito, mientras que analgésicos agonistas del receptor opioide- $\mu$  producen prurito.<sup>7</sup> El dolor neuropático crónico, con o sin prurito asociado, es la consecuencia de la sensibilización periférica y central en el sistema espinotalámico. Estos temas han sido ampliamente revisados.<sup>15-19</sup> La sensibilización periférica refleja cambios plásticos en la expresión de la función de una amplia variedad de canales catiónicos en los nociceptores, incluyendo TRPV1 y varios tipos de canales de sodio dependientes de voltaje ( $Na_v$ ), en respuesta a la lesión axonal o la inflamación del tejido. Estos mecanismos no se discuten aquí.

**Potenciación a largo plazo de las sinapsis excitatorias en neuronas espinotalámicas.** En condiciones normales, el aumento de la actividad de los nociceptores desencadena una potenciación a largo plazo de la actividad dependiente de la sinapsis excitatorias glutamatérgicas hacia su blanco de acción que son las neuronas de proyección del asta dorsal, esto se conoce como potenciación homosináptica a largo plazo.<sup>15,16</sup> La activación repetitiva de los nociceptores también gatilla la potenciación heterosináptica a largo plazo, mediante el cual estímulos condicionantes específicos conducen a la facilitación sostenida a largo plazo de las respuestas de las neuronas del asta dorsal hacia las señales aferentes no nociceptivas de tipo A $\beta$  o C. La potenciación heterosináptica a largo plazo también permite la variación de la propagación de la actividad sináptica a las sinapsis circundantes no activadas; esto resulta en la expansión del territorio estímulo sensible fuera del territorio del nervio dañado o más allá del área de la lesión tisular.

La potenciación a largo plazo puede ocurrir a un nivel presináptico o post-sináptico y refleja en gran medida mecanismos mediados por calcio ( $Ca^{2+}$ ).<sup>15,16</sup> La potenciación post sináptica a largo plazo se desencadena por el ingreso de  $Ca^{2+}$  a través de canales voltaje dependientes  $Ca_v1.2$  (tipo L) y receptores NMDA, así como la liberación de  $Ca^{2+}$  desde depósitos intracelulares provocados por los receptores acoplados a proteína G, tales como los receptores metabotrópicos de glutamato, o por los receptores de tirosina quinasa, tales como el receptor de tirosina quinasa B para el factor neurotrófico derivado del cerebro (BDNF). El incremento resultante del  $Ca^{2+}$  intracelular desencadena varias cascadas, incluyendo aquellas mediadas por una variedad de proteínas quinasas, tales como la quinasa regulada por señal extracelular. Esto resulta en una regulación en alza de la expresión del receptor ácido  $\alpha$ -amino-3-hidroxi-5-metil-isoxazol propiónico (AMPA) en la membrana post sináptica, la activación de la transcripción y la traducción local de las proteínas sinápticas, y

cambios estructurales en las espinas dendríticas. En condiciones normales, la sensibilización central se inicia por un estímulo condicionado de aferentes nociceptivos peptidérgicos y refleja la coliberación de glutamato con la sustancia P; estos neuropéptidos actúan a través de receptores NK1 para obtener la despolarización de la membrana, y por ende la activación del receptor NMDA. Mecanismos presinápticos conducen a una mayor liberación de glutamato a partir de aferentes C en el asta dorsal; esto puede ser promovido por óxido nítrico a través de la fosforilación mediada por la cascada fosforilativa de la proteína quinasa G.<sup>15</sup>

**Cambios plásticos en las fibras aferentes primarias e interneuronas excitatorias.** La axotomía periférica conduce a la arborización de aferentes A $\beta$  en la lámina I y la lámina externa II.<sup>67</sup> Después de la lesión del nervio, aferentes A $\beta$  presentan un cambio fenotípico incluyendo la sobreexpresión de la sustancia P y otros neuropéptidos;<sup>15,16</sup> sin embargo, no hay evidencia de que estas fibras liberen sustancia P para activar neuronas nociceptivas NK1R en la lámina I.<sup>1</sup>

La estimulación nociceptiva reiterada también desencadena fosforilación mediada por kinasas del

receptor extracelular y reduce la expresión de canales Kv4.2 en neuronas excitatorias; esto lleva al aumento de la excitabilidad de estas células y por lo tanto a promover dolor neuropático.<sup>68</sup>

**La pérdida de la inhibición en el asta dorsal.** Existe una vasta evidencia experimental de que las manifestaciones de dolor neuropático, tales como alodinia mecánica y prurito, reflejan una inhibición alterada dentro los circuitos del asta dorsal.<sup>69</sup> (Figura 2). Hay numerosos mecanismos que contribuyen a la pérdida de inhibición GABAérgica y glicinérgica en el asta dorsal en el contexto de una lesión axonal o inflamación tisular. Estos incluyen el daño excitotóxico de neuronas GABAérgicas, la depresión a largo plazo de la transmisión inhibitoria GABAérgica y la reducción de la eficacia de la transmisión inhibitoria a través de la vía GABA<sub>A</sub> o de los receptores de canales de glicina.<sup>69,70</sup> Por ejemplo, algunas interneuronas GABAérgicas en el asta dorsal expresan los receptores TRPV1; la activación de estos receptores puede provocar depresión a largo plazo de las señales excitadoras de fibras mielinizadas a estas interneuronas inhibitorias.<sup>71</sup> El daño axonal periférico también desencadena señalización

Figura 2 Pérdida de inhibición en el asta dorsal como un mecanismo de alodinia mecánica y prurito neuropático

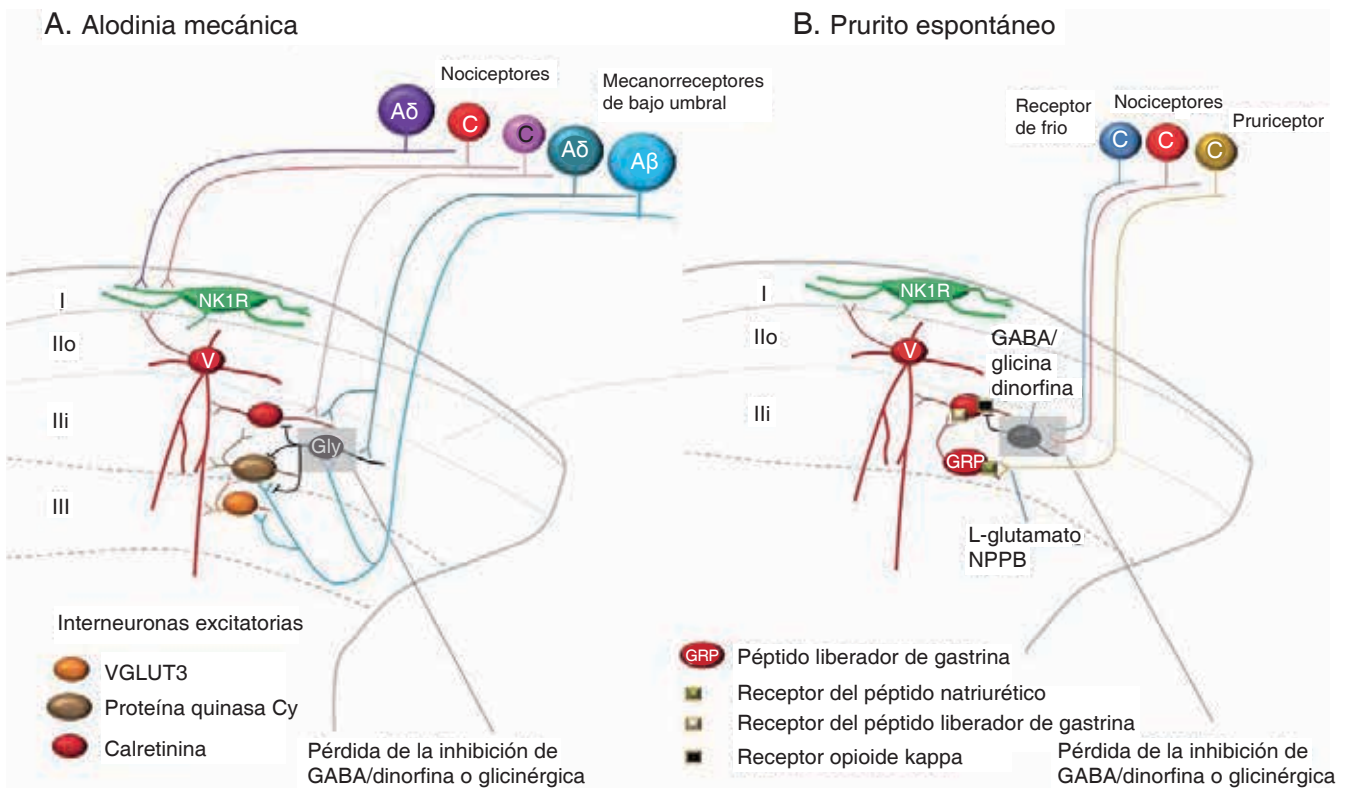

(A) La pérdida del control inhibitorio por interneuronas ácido  $\gamma$ -aminobutírico (GABA)/glicinérgicas en el asta dorsal es un mecanismo importante para la expresión del dolor neuropático. La alodinia mecánica persistente refleja la pérdida del control inhibitorio sobre neuronas excitatorias involucradas en la vía polisináptica de proyección dorsal secuencial, que permite a señales de mecanorreceptores de bajo umbral A $\beta$ , que terminan en la lámina III, activar neuronas nociceptivas en la lámina I y por ende producir dolor. Esta vía involucra neuronas que expresan el transportador de glutamato vesicular 3 (VGLUT3) en la lámina III, interneuronas que expresan proteína quinasa Cy en la lámina interna II, y células verticales de la lámina externa II que proyectan a neuronas nociceptivas de proyección que expresan el receptor de neuroquinina 1 en la lámina I. (B) La remoción de la inhibición por interneuronas que expresan GABA/dinorfina, glicina o ambas resulta en prurito neuropático. La vía multisináptica del prurito del asta dorsal incluye aferentes primarios C pruriceptivos que liberan polipéptido natriurético B (NPPB) que, actuando mediante receptores de péptido natriurético, activan un grupo de interneuronas que expresan péptido de liberación gástrico y, tanto directa como indirectamente, envían señales de prurito a través de neuronas espinotalámicas de la lámina I.

presináptica  $Ca^{2+}$  dependiente que da como resultado una regulación en baja generalizada de la vía excitatoria a las neuronas GABAérgicas desde fibras nociceptivas A $\delta$  y C.<sup>72</sup>

En el contexto de una lesión axonal, hay activación de la microglía en el asta dorsal.<sup>73</sup> La microglía de la médula espinal tiene un papel importante en la génesis de dolor persistente a través de la liberación de varios mediadores que regulan la plasticidad sináptica de circuitos excitatorios e inhibitorios.<sup>74</sup> Por ejemplo, las citoquinas proinflamatorias promueven potenciación post sináptica a largo plazo de las sinapsis excitadoras en las neuronas de proyección del asta dorsal. El BDNF derivado de la microglía reduce la expresión del exportador de cloruro de potasio en las neuronas de la lámina I; esto conduce a un cambio en el potencial de equilibrio del cloro, reduciendo de ese modo la eficacia de la inhibición mediada por receptores GABA<sub>A</sub> y glicina.<sup>75</sup> Sin embargo, las neuronas GABAérgicas y glicinérgicas pueden retener su efecto inhibitorio en el contexto de una neuropatía. Por ejemplo, la administración de drogas que activan receptores GABA<sub>A</sub><sup>76</sup>, el trasplante de neuronas precursoras de GABA en el asta dorsal<sup>77</sup> o la activación selectiva de neuronas glicinérgicas<sup>62</sup> podrían reducir el dolor neuropático.

**Consecuencias de la inhibición defectuosa en el asta dorsal. Alodinia mecánica.** Estudios recientes muestran que la alodinia mecánica persistente involucra la pérdida de la inhibición de las interneuronas excitatorias involucradas secuencialmente en la vía de proyección excitatoria polisináptica dorsal que permite que las aferencias de mecanorreceptores de bajo umbral A $\beta$ , que terminan en la lámina III activen neuronas nociceptivas en la lámina I y, por lo tanto, evocan dolor (figura 2).<sup>78</sup> En condiciones normales, esta vía es inactiva debido a la inhibición por retroalimentación de las interneuronas GABA/glicinérgicas circundantes.<sup>42</sup> Tanto la depresión a largo plazo de las sinapsis excitadoras en neuronas GABAérgicas<sup>71</sup> o la ablación mediada por toxinas o el silenciamiento de neuronas glicinérgicas<sup>62</sup> resultan en alodinia mecánica. La eliminación de la inhibición de la glicina también puede permitir que estímulos táctiles activen astrocitos; los astrocitos activados pueden liberar D-serina, que se une al sitio coestimulador de glicina del receptor NMDA y promueve alodinia mediada por receptores NMDA.<sup>79</sup>

**Prurito neuropático.** La eliminación de la inhibición GABAérgica o glicinérgica también se traduce en prurito neuropático (figura 2). La vía polisináptica del prurito del asta dorsal<sup>25</sup> está bajo inhibición tónica por interneuronas inhibitorias GABA específicas que expresan galanina y el agonista del receptor opioide kappa dinorfina.<sup>60,61</sup> Estas interneuronas inhibitorias reciben señales desde aferentes de fibras C que expresan TRPV1, TRPA1 y canales TRMP8; esto explica por qué los estímulos dolorosos o el frío mejoran el prurito.<sup>60,61</sup> La de-

pleción selectiva de estas interneuronas resulta en prurito espontáneo y aumento de la sensibilidad a los agentes pruriginosos, sin afectar las respuestas a estímulos nocivos.<sup>60,61</sup> La depleción de interneuronas glicinérgicas también da lugar a manifestaciones conductuales del prurito.

**PERSPECTIVA** Los estudios que han incorporado enfoques inmunohistoquímicos, electrofisiológicos y genéticos han proporcionado información sobre los circuitos complejos para la transmisión y decodificación de la información sensorial en el asta dorsal. Estos estudios han elucidado aún más los mecanismos de control de la transmisión del dolor y las manifestaciones de dolor neuropático y el prurito, y proveen evidencia racional para nuevos enfoques terapéuticos de estos síntomas. Entre las drogas disponibles en la actualidad, gabapentina y pregabalina interactúan con la subunidad  $\alpha 2\delta$  de canales de  $Ca^{2+}$  presinápticos, reduciendo su expresión en la membrana y, por lo tanto, la liberación de su neurotransmisor; los opioides actúan a través de receptores de tipo  $\mu$  ambos presinápticamente inhibiendo la liberación mediada por  $Ca^{2+}$  y post sinápticamente aumentando la conductancia de  $K^+$  y de ese modo reduciendo la excitabilidad de células espinotalámicas; y los inhibidores de recaptación de norepinefrina/serotonina, como la amitriptilina o duloxetine, aumentan la disponibilidad de estas monoaminas en el asta dorsal. Sobre la base de estudios experimentales en animales con deleción selectiva de neuronas GABA/dinorfina,<sup>61</sup> el agonista del receptor opioide kappa nalfurafina está aprobado en Japón para el tratamiento del prurito asociado con la enfermedad renal crónica.<sup>80</sup> Un circuito del asta dorsal descrito recientemente de prurito inducido mecánicamente e inhibido tónicamente por interneuronas de neuropéptido Y<sup>81</sup> podría aportar nuevos blancos terapéuticos. El rol principal de la glicina en la inhibición de circuitos del asta dorsal podría aportar información racional para el desarrollo de drogas que actúen sobre la transmisión glicinérgica para el tratamiento del dolor neuropático y el prurito.

#### FINANCIACIÓN DEL ESTUDIO

No se informó financiación específica.

#### DECLARACIONES

E. Benarroch recibe un estipendio en su calidad de editor de la sección de Implicancias Clínicas de la Investigación en Neurociencias para *Neurology*. Ir a [Neurology.org](http://Neurology.org) para todos los detalles.

#### BIBLIOGRAFÍA

1. Todd AJ. Neuronal circuitry for pain processing in the dorsal horn. *Nat Rev Neurosci* 2010;11:823–836.
2. Braz J, Solorzano C, Wang X, Basbaum AI. Transmitting pain and itch messages: a contemporary view of the spinal cord circuits that generate gate control. *Neuron* 2014;82:522–536.
3. Mendell LM. Constructing and deconstructing the gate theory of pain. *Pain* 2014;155:210–216.
4. Ross SE, Hachisuka J, Todd AJ. Spinal microcircuits and the regulation of itch. In: Carstens E, Akiyama T, eds.



- Itch: Mechanisms and Treatment. Boca Raton, FL: CRC Press/Taylor & Francis; 2014.
5. Bautista DM, Wilson SR, Hoon MA. Why we scratch an itch: the molecules, cells and circuits of itch. *Nat Neurosci* 2014;17:175–182.
  6. Prescott SA, Ratte S. Pain processing by spinal microcircuits: afferent combinatorics. *Curr Opin Neurobiol* 2012;22:631–639.
  7. Davidson S, Giesler GJ. The multiple pathways for itch and their interactions with pain. *Trends Neurosci* 2010;33:550–558.
  8. Han L, Dong X. Itch mechanisms and circuits. *Annu Rev Biophys* 2014;43:331–355.
  9. LaMotte RH, Dong X, Ringkamp M. Sensory neurons and circuits mediating itch. *Nat Rev Neurosci* 2014;15:19–31.
  10. Hoon MA. Molecular dissection of itch. *Curr Opin Neurobiol* 2015;34:61–66.
  11. Campbell JN, Meyer RA. Mechanisms of neuropathic pain. *Neuron* 2006;52:77–92.
  12. Baron R, Binder A, Wasner G. Neuropathic pain: diagnosis, pathophysiological mechanisms, and treatment. *Lancet Neurol* 2010;9:807–819.
  13. Denk F, McMahon SB. Chronic pain: emerging evidence from the involvement of epigenetics. *Neuron* 2012;73:435–444.
  14. Truini A, Garcia-Larrea L, Cruccu G. Reappraising neuropathic pain in humans: how symptoms help disclose mechanisms. *Nat Rev Neurol* 2013;9:572–582.
  15. Luo C, Kuner T, Kuner R. Synaptic plasticity in pathological pain. *Trends Neurosci* 2014;37:343–355.
  16. von Hehn CA, Baron R, Woolf CJ. Deconstructing the neuropathic pain phenotype to reveal neural mechanisms. *Neuron* 2012;73:638–652.
  17. Prescott SA, Ma Q, De Koninck Y. Normal and abnormal coding of somatosensory stimuli causing pain. *Nat Neurosci* 2014;17:183–191.
  18. Dhand A, Aminoff MJ. The neurology of itch. *Brain* 2014;137:313–322.
  19. Misery L, Brenaut E, Le Garrec R, et al. Neuropathic pruritus. *Nat Rev Neurol* 2014;10:408–416.
  20. Rexed B. The cytoarchitectonic organization of the spinal cord in the cat. *J Comp Neurol* 1952;96:414–495.
  21. Liu Q, Dong X. The role of the Mrgpr receptor family in itch. *Handb Exp Pharmacol* 2015;226:71–88.
  22. Akiyama T, Carstens E. Neural processing of itch. *Neuroscience* 2013;250:697–714.
  23. Wilson SR, Gerhold KA, Bifulco-Fisher A, et al. TRPA1 is required for histamine-independent, Mas-related G protein-coupled receptor-mediated itch. *Nat Neurosci* 2011;14:595–602.
  24. Schmelz M, Schmidt R, Weidner C, Hilliges M, Torebjork HE, Handwerker HO. Chemical response pattern of different classes of C-nociceptors to pruritogens and algogens. *J Neurophysiol* 2003;89:2441–2448.
  25. Mishra SK, Hoon MA. The cells and circuitry for itch responses in mice. *Science* 2013;340:968–971.
  26. Han L, Ma C, Liu Q, et al. A subpopulation of nociceptors specifically linked to itch. *Nat Neurosci* 2013;16:174–182.
  27. McGlone F, Wessberg J, Olausson H. Discriminative and affective touch: sensing and feeling. *Neuron* 2014;82:737–755.
  28. Bardoni R, Tawfik VL, Wang D, et al. Delta opioid receptors presynaptically regulate cutaneous mechanosensory neuron input to the spinal cord dorsal horn. *Neuron* 2014;81:1312–1327.
  29. Dhaka A, Earley TJ, Watson J, Patapoutian A. Visualizing cold spots: TRPM8-expressing sensory neurons and their projections. *J Neurosci* 2008;28:566–575.
  30. Vriens J, Nilius B, Voets T. Peripheral thermosensation in mammals. *Nat Rev Neurosci* 2014;15:573–589.
  31. Han ZS, Zhang ET, Craig AD. Nociceptive and thermoreceptive lamina I neurons are anatomically distinct. *Nat Neurosci* 1998;1:218–225.
  32. Almarestani L, Waters SM, Krause JE, Bennett GJ, Ribeiro-da-Silva A. Morphological characterization of spinal cord dorsal horn lamina I neurons projecting to the parabrachial nucleus in the rat. *J Comp Neurol* 2007;504:287–297.
  33. Willis WD Jr. The somatosensory system, with emphasis on structures important for pain. *Brain Res Rev* 2007;55:297–313.
  34. Craig AD. Topographically organized projection to posterior insular cortex from the posterior portion of the ventral medial nucleus in the long-tailed macaque monkey. *J Comp Neurol* 2014;522:36–63.
  35. De Felipe C, Herrero JF, O'Brien JA, et al. Altered nociception, analgesia and aggression in mice lacking the receptor for substance P. *Nature* 1998;392:394–397.
  36. Borsook D, Upadhyay J, Klimas M, et al. Decision-making using fMRI in clinical drug development: revisiting NK-1 receptor antagonists for pain. *Drug Discov Today* 2012;17:964–973.
  37. Almarestani L, Waters SM, Krause JE, Bennett GJ, Ribeiro-da-Silva A. De novo expression of the neurokinin 1 receptor in spinal lamina I pyramidal neurons in polyarthritis. *J Comp Neurol* 2009;514:284–295.
  38. Braz JM, Nassar MA, Wood JN, Basbaum AI. Parallel “pain” pathways arise from subpopulations of primary afferent nociceptor. *Neuron* 2005;47:787–793.
  39. Hantman AW, van den Pol AN, Perl ER. Morphological and physiological features of a set of spinal substantia gelatinosa neurons defined by green fluorescent protein expression. *J Neurosci* 2004;24:836–842.
  40. Yasaka T, Tiong SY, Hughes DI, Riddell JS, Todd AJ. Populations of inhibitory and excitatory interneurons in lamina II of the adult rat spinal dorsal horn revealed by a combined electrophysiological and anatomical approach. *Pain* 2010;151:475–488.
  41. Polgar E, Durieux C, Hughes DI, Todd AJ. A quantitative study of inhibitory interneurons in laminae I-III of the mouse spinal dorsal horn. *PLoS One* 2013;8:e78309.
  42. Duan B, Cheng L, Bourane S, et al. Identification of spinal circuits transmitting and gating mechanical pain. *Cell* 2014;159:1417–1432.
  43. Punnakkal P, von Schoultz C, Haenraets K, Wildner H, Zeilhofer HU. Morphological, biophysical and synaptic properties of glutamatergic neurons of the mouse spinal dorsal horn. *J Physiol* 2014;592:759–776.
  44. Smith KM, Boyle KA, Madden JF, et al. Functional heterogeneity of calretinin-expressing neurons in the mouse superficial dorsal horn: implications for spinal pain processing. *J Physiol* 2015;593:4319–4339.
  45. Hughes DI, Sikander S, Kinnon CM, et al. Morphological, neurochemical and electrophysiological features of parvalbumin-expressing cells: a likely source of axo-axonic inputs in the mouse spinal dorsal horn. *J Physiol* 2012;590:3927–3951.
  46. Xu Y, Lopes C, Wende H, et al. Ontogeny of excitatory spinal neurons processing distinct somatic sensory modalities. *J Neurosci* 2013;33:14738–14748.
  47. Peirs C, Patil S, Bouali-Benazzou R, Artola A, Landry M, Dalle R. Protein kinase C gamma interneurons in the rat medullary dorsal horn: distribution and synaptic inputs to these neurons, and subcellular localization of the enzyme. *J Comp Neurol* 2014;522:393–413.
  48. Knowlton WM, Palkar R, Lippoldt EK, et al. A sensory-labeled line for cold: TRPM8-expressing sensory neurons define the cellular basis for cold, cold pain, and cooling-mediated analgesia. *J Neurosci* 2013;33:2837–2848.
  49. Zhang J, Cavanaugh DJ, Nemenov MI, Basbaum AI. The modality-specific contribution of peptider-

- gic and non-peptidergic nociceptors is manifest at the level of dorsal horn nociceptive neurons. *J Physiol* 2013;591:1097–1110.
50. Zheng J, Lu Y, Perl ER. Inhibitory neurones of the spinal substantia gelatinosa mediate interaction of signals from primary afferents. *J Physiol* 2010;588:2065–2075.
  51. Uta D, Furue H, Pickering AE, et al. TRPA1-expressing primary afferents synapse with a morphologically identified subclass of substantia gelatinosa neurons in the adult rat spinal cord. *Eur J Neurosci* 2010;31:1960–1973.
  52. Wang H, Zylka MJ. Mrgprd-expressing polymodal nociceptive neurons innervate most known classes of substantia gelatinosa neurons. *J Neurosci* 2009;29:13202–13209.
  53. Scherrer G, Imamachi N, Cao YQ, et al. Dissociation of the opioid receptor mechanisms that control mechanical and heat pain. *Cell* 2009;137:1148–1159.
  54. Lu Y, Perl ER. Modular organization of excitatory circuits between neurons of the spinal superficial dorsal horn (laminae I and II). *J Neurosci* 2005;25:3900–3907.
  55. Wang X, Zhang J, Eberhart D, et al. Excitatory superficial dorsal horn interneurons are functionally heterogeneous and required for the full behavioral expression of pain and itch. *Neuron* 2013;78:312–324.
  56. Miraucourt LS, Dallel R, Voisin DL. Glycine inhibitory dysfunction turns touch into pain through PKC $\gamma$  interneurons. *PLoS One* 2007;2:e1116.
  57. Sowards TV, Sowards M. Separate, parallel sensory and hedonic pathways in the mammalian somatosensory system. *Brain Res Bull* 2002;58:243–260.
  58. Melzack R, Wall PD. Pain mechanisms: a new theory. *Science* 1965;150:971–979.
  59. Yasaka T, Kato G, Furue H, et al. Cell-type-specific excitatory and inhibitory circuits involving primary afferents in the substantia gelatinosa of the rat spinal dorsal horn in vitro. *J Physiol* 2007;581:603–618.
  60. Ross SE, Mardinly AR, McCord AE, et al. Loss of inhibitory interneurons in the dorsal spinal cord and elevated itch in Bhlhb5 mutant mice. *Neuron* 2010;65:886–898.
  61. Kardon AP, Polgar E, Hachisuka J, et al. Dynorphin acts as a neuromodulator to inhibit itch in the dorsal horn of the spinal cord. *Neuron* 2014;82:573–586.
  62. Foster E, Wildner H, Tudeau L, et al. Targeted ablation, silencing, and activation establish glycinergic dorsal horn neurons as key components of a spinal gate for pain and itch. *Neuron* 2015;85:1289–1304.
  63. Lu Y, Perl ER. Selective action of noradrenaline and serotonin on neurones of the spinal superficial dorsal horn in the rat. *J Physiol* 2007;582:127–136.
  64. Sikand P, Shimada SG, Green BG, LaMotte RH. Similar itch and nociceptive sensations evoked by punctate cutaneous application of capsaicin, histamine and cowhage. *Pain* 2009;144:66–75.
  65. Sandroni P, Martin DP, Bruce BK, Rome JD. Congenital idiopathic inability to perceive pain: a new syndrome of insensitivity to pain and itch with preserved small fibers. *Pain* 2006;122:210–215.
  66. Indo Y. Nerve growth factor, pain, itch and inflammation: lessons from congenital insensitivity to pain with anhidrosis. *Expert Rev Neurother* 2010;10:1707–1724.
  67. Woolf CJ, Shortland P, Coggeshall RE. Peripheral nerve injury triggers central sprouting of myelinated afferents. *Nature* 1992;355:75–78.
  68. Huang HY, Cheng JK, Shih YH, Chen PH, Wang CL, Tsaor ML. Expression of A-type K channel  $\alpha$  subunits Kv 4.2 and Kv 4.3 in rat spinal lamina II excitatory interneurons and colocalization with pain-modulating molecules. *Eur J Neurosci* 2005;22:1149–1157.
  69. Zeilhofer HU, Wildner H, Yevens GE. Fast synaptic inhibition in spinal sensory processing and pain control. *Physiol Rev* 2012;92:193–235.
  70. Braz JM, Wang X, Guan Z, Rubenstein JL, Basbaum AI. Transplant-mediated enhancement of spinal cord GABAergic inhibition reverses paclitaxel-induced mechanical and heat hypersensitivity. *Pain* 2015;156:1084–1091.
  71. Kim YH, Back SK, Davies AJ, et al. TRPV1 in GABAergic interneurons mediates neuropathic mechanical allodynia and disinhibition of the nociceptive circuitry in the spinal cord. *Neuron* 2012;74:640–647.
  72. Leitner J, Westerholz S, Heinke B, et al. Impaired excitatory drive to spinal GABAergic neurons of neuropathic mice. *PLoS One* 2013;8:e73370.
  73. Graeber MB, Christie MJ. Multiple mechanisms of microglia: a gatekeeper's contribution to pain states. *Exp Neurol* 2012;234:255–261.
  74. Taves S, Berta T, Chen G, Ji RR. Microglia and spinal cord synaptic plasticity in persistent pain. *Neural Plast* 2013;2013:753656.
  75. Coull JA, Beggs S, Boudreau D, et al. BDNF from microglia causes the shift in neuronal anion gradient underlying neuropathic pain. *Nature* 2005;438:1017–1021.
  76. Knabl J, Witschi R, Hosl K, et al. Reversal of pathological pain through specific spinal GABA receptor subtypes. *Nature* 2008;451:330–334.
  77. Braz JM, Sharif-Naeini R, Vogt D, et al. Forebrain GABAergic neuron precursors integrate into adult spinal cord and reduce injury-induced neuropathic pain. *Neuron* 2012;74:663–675.
  78. Peirs C, Williams SP, Zhao X, et al. Dorsal horn circuits for persistent mechanical pain. *Neuron* 2015;87:797–812.
  79. Miraucourt LS, Peirs C, Dallel R, Voisin DL. Glycine inhibitory dysfunction turns touch into pain through astrocyte-derived D-serine. *Pain* 2011;152:1340–1348.
  80. Kumagai H, Ebata T, Takamori K, et al. Efficacy and safety of a novel k-agonist for managing intractable pruritus in dialysis patients. *Am J Nephrol* 2012;36:175–183.
  81. Bourane S, Duan B, Koch SC, et al. Gate control of mechanical itch by a subpopulation of spinal cord interneurons. *Science* 2015;350:550–554.
